# Supplementary material
Source: PubMed Central journal article supplement (PMC3579657)
Supplement: NIHMS439889-supplement-Supple.pdf [file NIHMS439889-supplement-Supple.pdf]

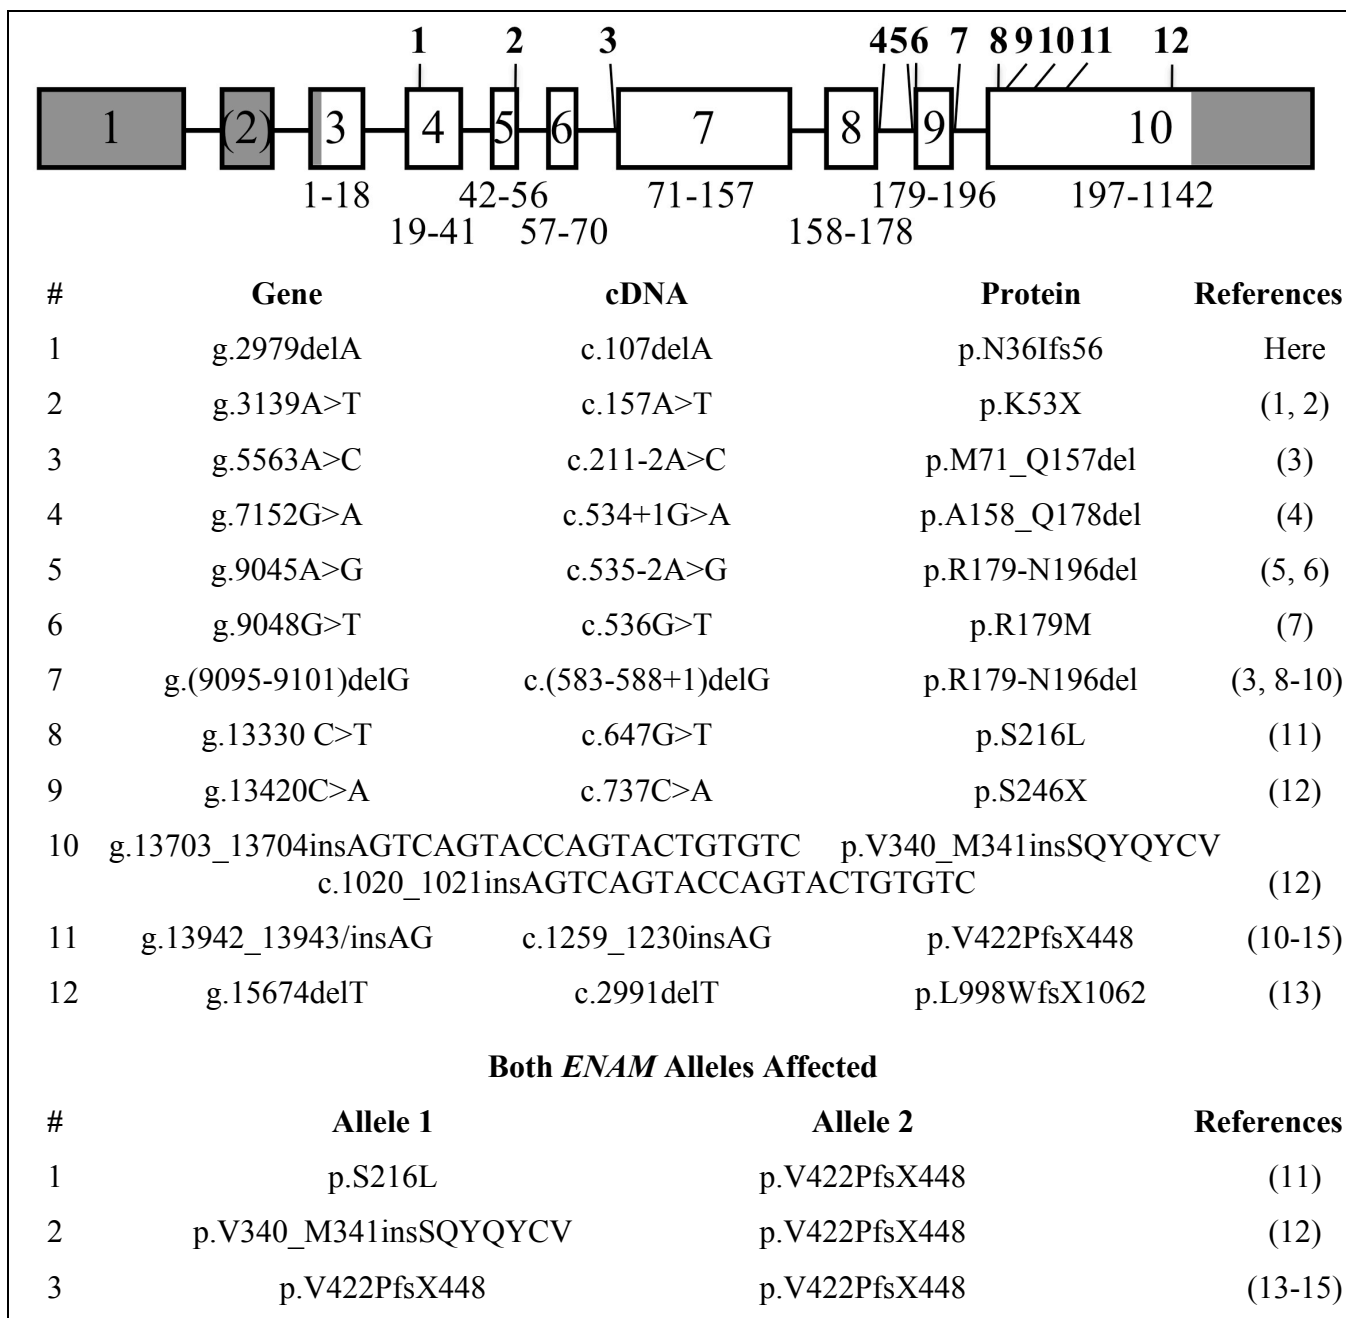

**Supplemental Figure 1.** *ENAM* gene structure and disease-causing mutations. The numbered boxes are exons; the lines introns. The numbers below each exon show the range of amino acids encoded by it. Shaded exon regions are non-coding. Bold numbers indicate *ENAM* mutations. The gene numbers start from the first nucleotide of the *ENAM* reference sequence NG\_013024.1. The cDNA numbers start from the translation initiation site of *ENAM* reference sequence NM\_031889.2. The protein designations are deduced and have not been verified experimentally.

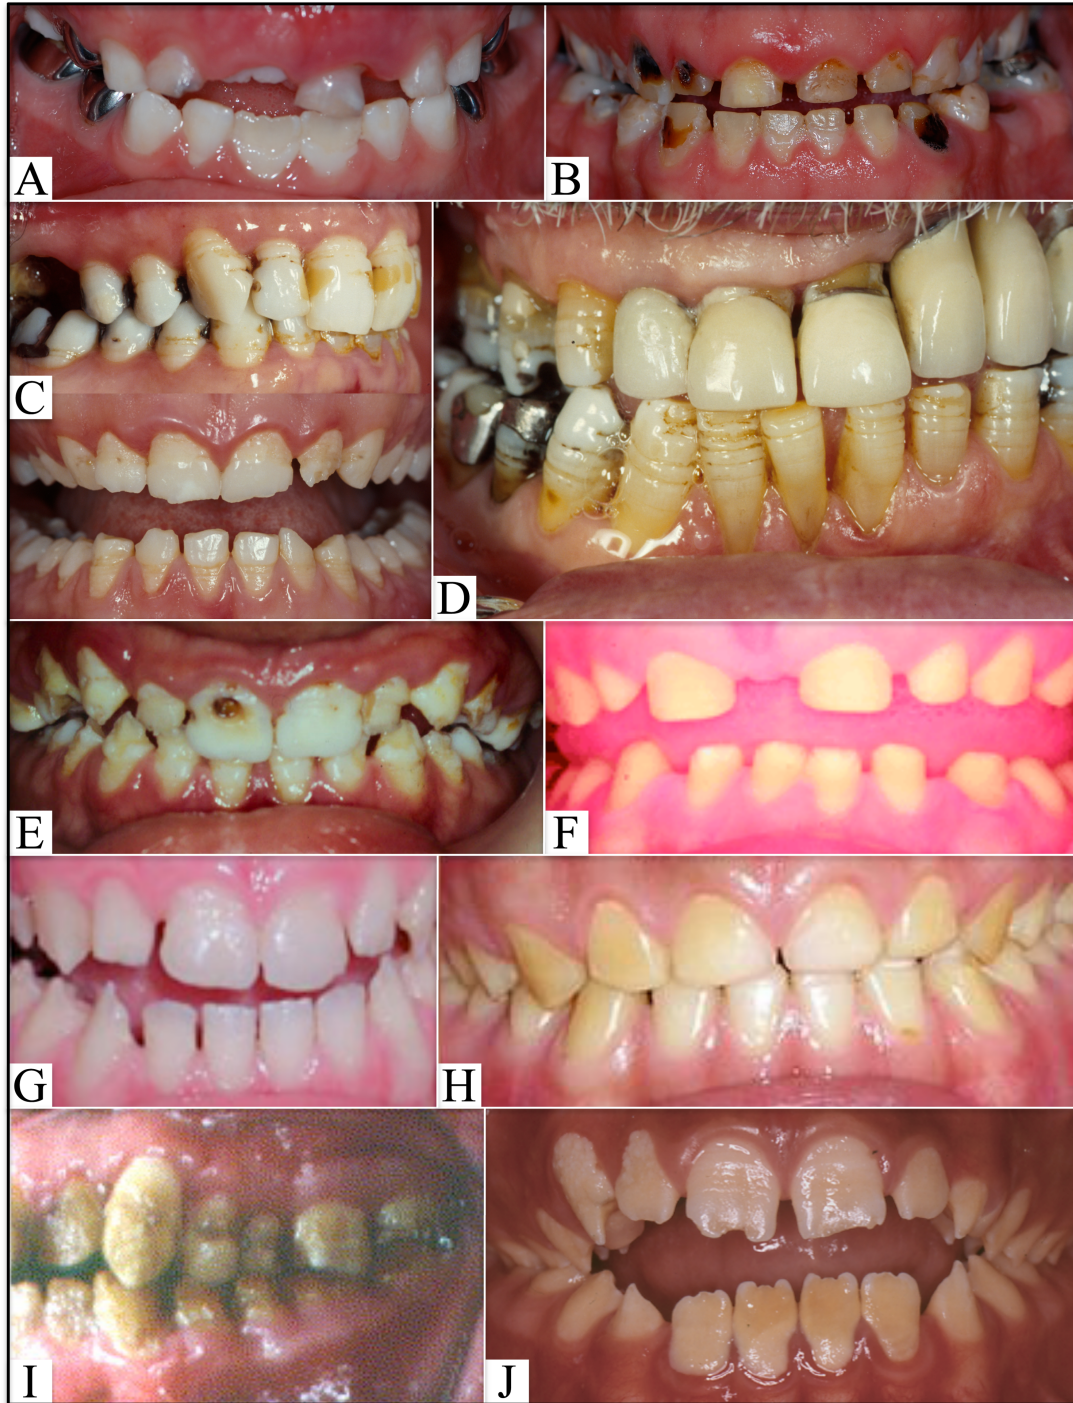

**Supplemental Figure 2.** Oral photos of phenotypes associated with defined heterozygous *ENAM* defects. **A-B:** c.107delA exon 4 frameshift (this report), **C-D:** c.157A>T exon 5 nonsense mutation (1) with permission from Oxford University Press; (2) with permission from John Wiley & Sons A/S, **E:** c.211-2A>C intron 6 splice junction acceptor (3), **F:** c.534+1G>A intron 8 splice junction donor (4) with permission of Oxford University Press, **G-H:** c.535-2A>G intron 8 splice junction acceptor (5) with permission from Kager Publishers (6), **I:** c.536G>T first codon in exon 9 missense mutation (p.R179M), (7) with permission of Elsevier, **J:** c.(583-588+1)delG exon 9 frameshift/intron 9 splice junction donor (3).

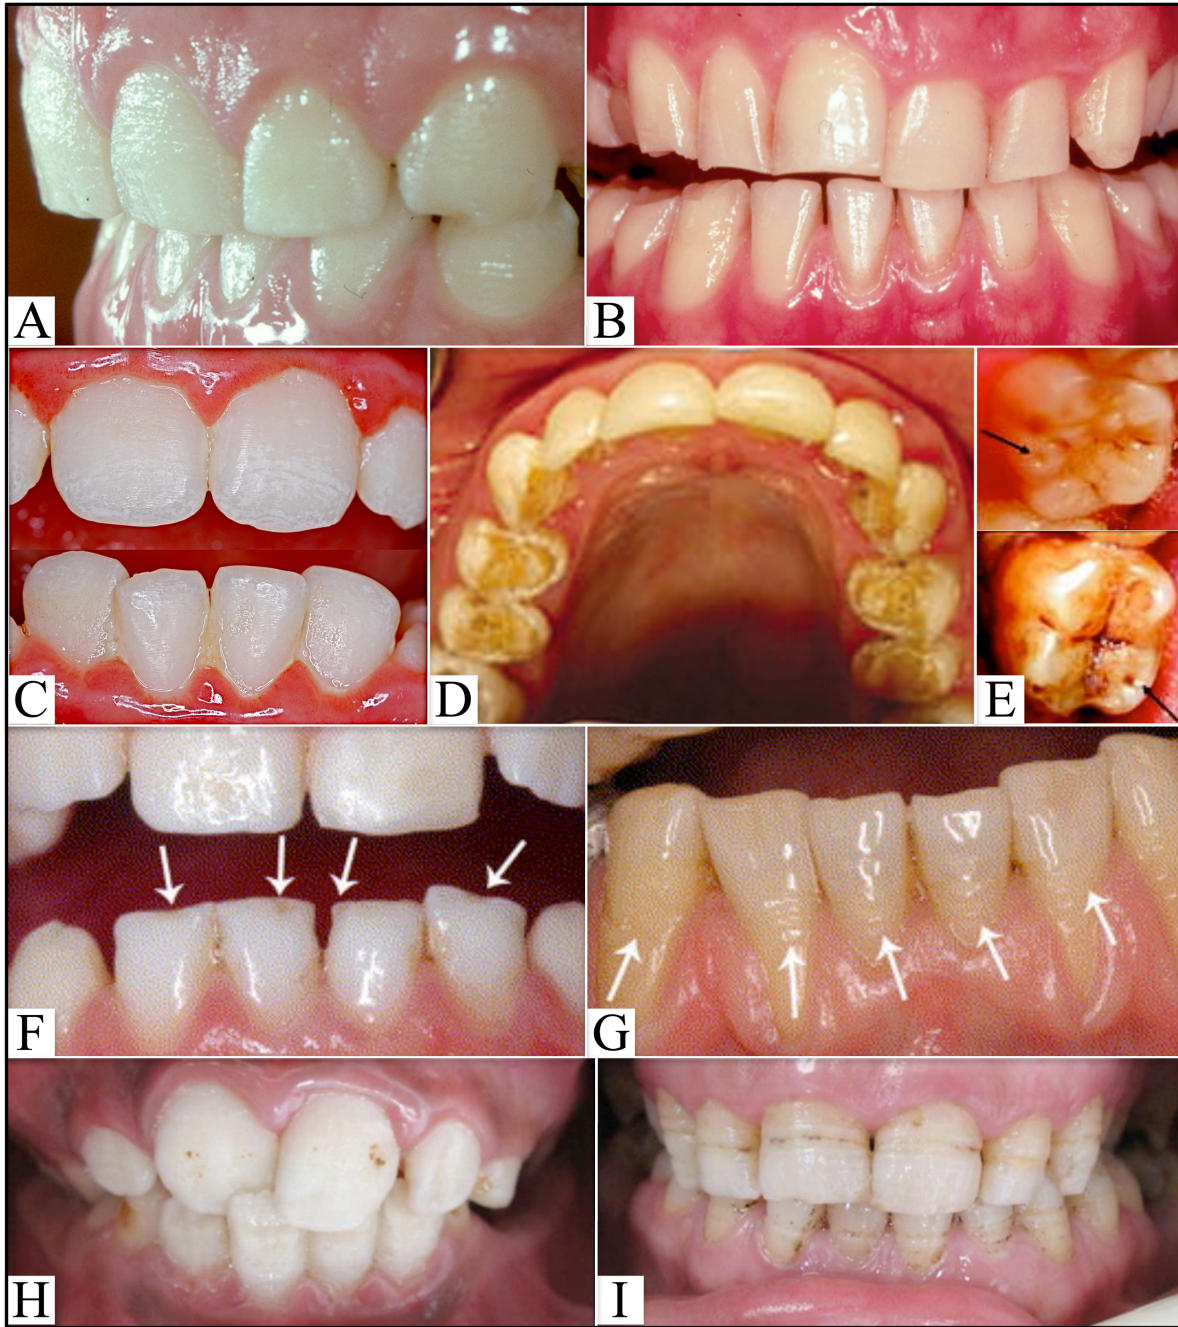

**Supplemental Figure 3.** Oral photos of phenotypes associated with defined 5' *ENAM* defects. **A-B:** c.(583-588+1)delG exon 9 frameshift/intron 9 splice junction donor (9) with permission from Elsevier, **C:** c.647G>T exon 10 phosphoserine missense mutation (p.S216L) (11), **D:** c.737C>A exon 10 nonsense mutation (p.S246X) (12) reprinted by permission of SAGE Publications, **E:** c.1020\_1021insAGTCAGTACCAGTACTGTGTC exon 10 insertion (p.V340\_M341insSQYQYCV) (12) reprinted by permission of SAGE Publications, **F-G:** c.1259\_1230insAG exon 10 frameshift (p.V422PfsX448) (10) with permission from Elsevier, **H-I:** c.2991delT exon 10 frameshift (p.L998WfsX1062) (13) reprinted by permission of SAGE Publications.

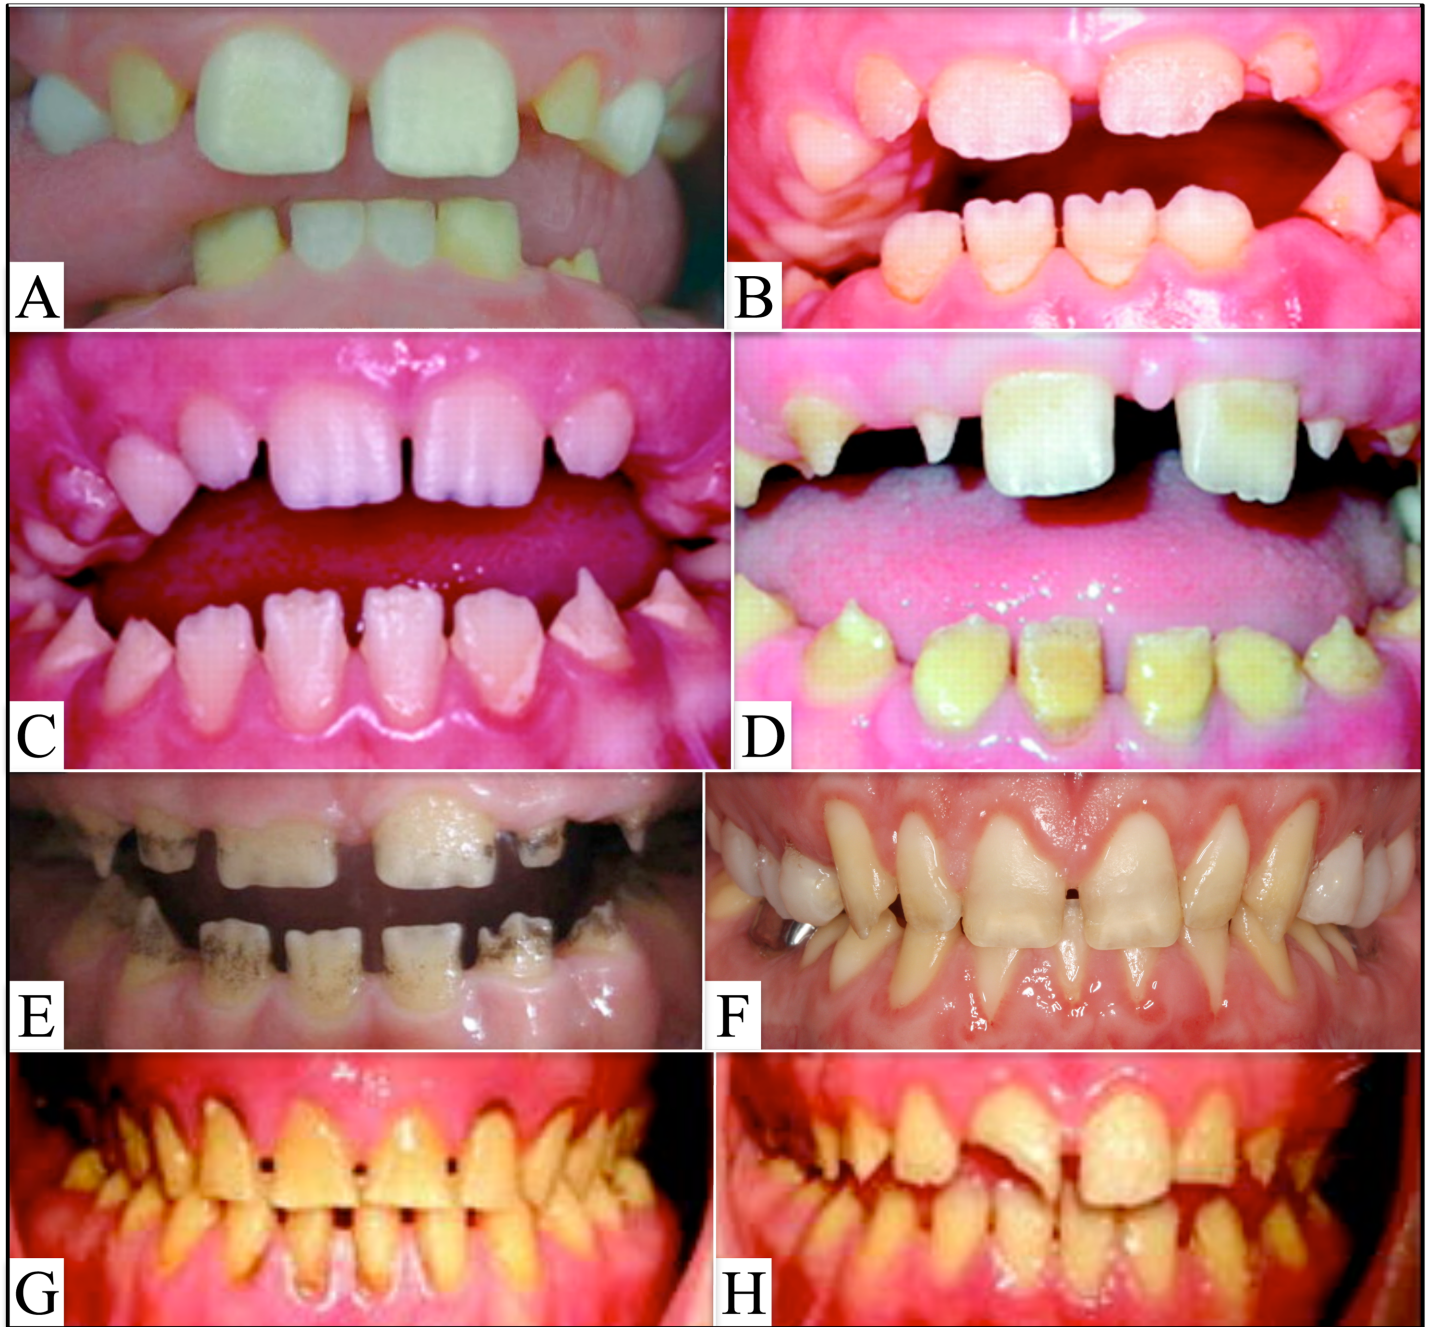

**Supplemental Figure 4.** Oral photos of phenotypes associated with *ENAM* defects in both alleles. In all cases reported so far, one *ENAM* allele has always been the p.V422PfsX448 exon 10 frameshift. **A-E:** exon 10 frameshift (p.V422PfsX448) in both alleles (13) reprinted by permission of SAGE Publications; (14) with permission from BMJ Publishing Group Ltd; (15) with permission of the American Academy of Pediatric Dentistry, **F:** p.S216L/p.V422PfsX448 compound heterozygote (11), **G-H:** p.V340\_M341insSQYQYCV/p.V422PfsX448 compound heterozygote (12) reprinted by permission of SAGE Publications. In all cases of homozygous *ENAM* defects the phenotype is severe, generalized enamel hypoplasia.

## Supplemental Data References

1. Mårdh CK, Backman B, Holmgren G et al. A nonsense mutation in the enamelin gene causes local hypoplastic autosomal dominant amelogenesis imperfecta (AIH2). *Hum Mol Genet* 2002; 11: 1069-1074.
2. Kim JW, Simmer JP, Lin BP et al. Mutational analysis of candidate genes in 24 amelogenesis imperfecta families. *Eur J Oral Sci* 2006; 114 Suppl 1: 3-12.
3. Kim JW, Seymen F, Lin BP et al. ENAM mutations in autosomal-dominant amelogenesis imperfecta. *J Dent Res* 2005; 84: 278-282.
4. Rajpar MH, Harley K, Laing C et al. Mutation of the gene encoding the enamel-specific protein, enamelin, causes autosomal-dominant amelogenesis imperfecta. *Hum Mol Genet* 2001; 10: 1673-1677.
5. Wright JT, Torain M, Long K et al. Amelogenesis Imperfecta: Genotype-Phenotype Studies in 71 Families. *Cells Tissues Organs* 2011; 194: 279-283.
6. Song YL, Wang CN, Zhang CZ et al. Molecular characterization of amelogenesis imperfecta in Chinese patients. *Cells Tissues Organs* in press.
7. Gutierrez SJ, Chaves M, Torres DM et al. Identification of a novel mutation in the enamelin gene in a family with autosomal-dominant amelogenesis imperfecta. *Arch Oral Biol* 2007; 52: 503-506.
8. Kida M, Ariga T, Shirakawa T et al. Autosomal-dominant hypoplastic form of amelogenesis imperfecta caused by an enamelin gene mutation at the exon-intron boundary. *J Dent Res* 2002; 81: 738-742.
9. Hart PS, Michalec MD, Seow WK et al. Identification of the enamelin (g.8344delG) mutation in a new kindred and presentation of a standardized ENAM nomenclature. *Arch Oral Biol* 2003; 48: 589-596.
10. Pavlic A, Petelin M, Battelino T. Phenotype and enamel ultrastructure characteristics in patients with ENAM gene mutations g.13185-13186insAG and 8344delG. *Arch Oral Biol* 2007; 52: 209-217.
11. Chan HC, Mai L, Oikonomopoulou A et al. Altered enamelin phosphorylation site causes amelogenesis imperfecta. *J Dent Res* 2010; 89: 695-699.
12. Ozdemir D, Hart PS, Firatli E et al. Phenotype of ENAM Mutations is Dosage-dependent. *J Dent Res* 2005; 84: 1036-1041.
13. Kang HY, Seymen F, Lee SK et al. Candidate gene strategy reveals ENAM mutations. *J Dent Res* 2009; 88: 266-269.
14. Hart TC, Hart PS, Gorry MC et al. Novel ENAM mutation responsible for autosomal recessive amelogenesis imperfecta and localised enamel defects. *J Med Genet* 2003; 40: 900-906.
15. Lindemeyer RG, Gibson CW, Wright TJ. Amelogenesis Imperfecta Due to a Mutation of the Enamelin Gene: Clinical Case With Genotype-phenotype Correlations. *Pediatr Dent* 2010; 32: 56-60.
